# Supplementary material
Source: Springer Nature journal article supplement (https://www.springermedizin.de/resource/supplementary/12967_2006_110_MOESM1_ESM.pdf/9575820)

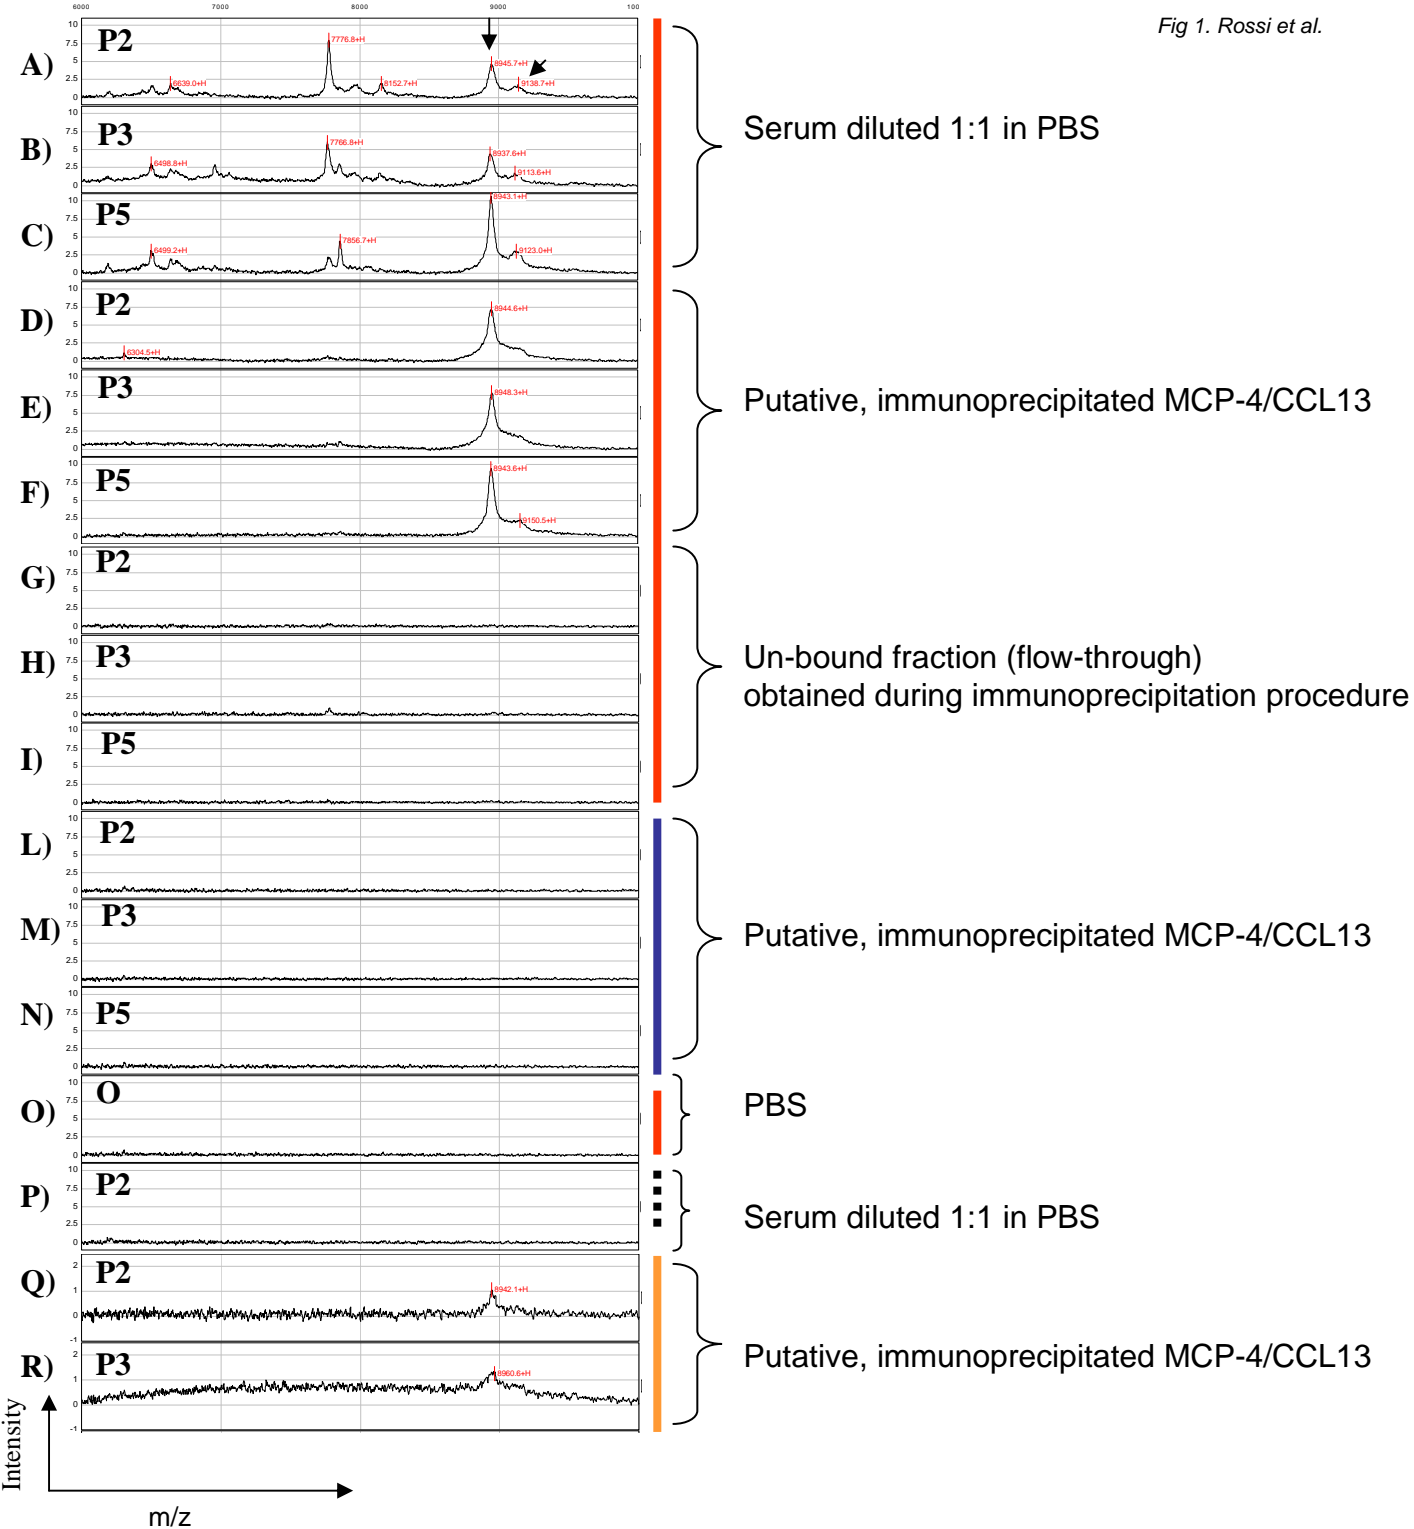

- MCP-4/CCL13 clone 18 pre-coated chip
- MCP-4/CCL13 clone 20 pre-coated chip
- IL-6 pre-coated chip
- - - Uncoupled PG20 chip

Supplement: MOESM1 [file 9575820]
